# Supplementary material for: High-Throughput Canopy and Belowground Phenotyping of a Set of Peanut CSSLs Detects Lines with Increased Pod Weight and Foliar Disease Tolerance
Source: MDPI journal article supplement (doi:10.3390/agronomy13051223), 2023-04-26
Supplement: s1 [file s1]

### Supplementary Tables

**Table S4:** Summary analysis of interactions between samples and field for manually collected data and spectral indices

| Trait                                                 | Type           | Sample | Field | Sample X Field |
|-------------------------------------------------------|----------------|--------|-------|----------------|
| TSWV mid season                                       | Manual         | ***    | ***   | NS             |
| Leaf spot                                             | Manual         | ***    | ***   | NS             |
| Pod weight                                            | Manual         | ***    | ***   | *              |
| TSWV late season                                      | Manual         | NA     | NA    | NA             |
| Green Vegetation Index-R (GRV)                        | RGB            | ***    | ***   | *              |
| Green Leaf Index (GLI)                                | RGB            | ***    | ***   | NS             |
| Visible Atmospherically Resistant Index (VARI)        | RGB            | ***    | ***   | *              |
| Chlorophyll Index-RE (CIRE )                          | Multi-spectral | ***    | ***   | NS             |
| Difference Vegetation Index (DVI )                    | Multi-spectral | ***    | ***   | NS             |
| Green Normalized Difference Vegetation Index (GNDVI ) | Multi-spectral | ***    | ***   | NS             |
| Normalized Difference Vegetation Index ( NDVI)        | Multi-spectral | ***    | ***   | NS             |
| Normalized Green (NG )                                | Multi-spectral | ***    | ***   | NS             |
| Optimized Soil Adjusted Vegetation Index ( OSAVI )    | Multi-spectral | ***    | ***   | NS             |
| Ratio Vegetation Index (RVI )                         | Multi-spectral | ***    | ***   | NS             |
| Soil Adjusted Vegetation Index ( SAVI )               | Multi-spectral | ***    | ***   | NS             |
| Triangular Vegetation Index ( TVI )                   | Multi-spectral | ***    | ***   | NS             |
| Mid season canopy temperature depression              | Thermal        | NS     | ***   | NS             |
| End season canopy temperature depression              | Thermal        | **     | ***   | NS             |

NS      P > 0.05  
 \*        P ≤ 0.05  
 \*\*       P ≤ 0.01  
 \*\*\*     P ≤ 0.001

**Table S5:** Ranking of the chromosome segment substitution lines (CSSLs) based on Green Normalized Difference Vegetation Index (GNDVI), Visible Atmospherically Resistant Index (VARI) and Green Vegetation Index-R (GRV). The indices generally rank the lines similarly to the manual data, showing their capacity for selection in this population

| Sample    | Field | GNDVI | Rank<br>GNDVI | GRV  | Rank<br>GRV | VARI | Rank<br>VARI | Pod<br>weight | Rank<br>Pod<br>weight | Leaf<br>spot | Rank<br>leaf<br>spot | TSWV<br>mid<br>season | Rank<br>TSWV<br>mid<br>season | TSWV<br>late<br>season | Rank<br>TSWV<br>late<br>season |
|-----------|-------|-------|---------------|------|-------------|------|--------------|---------------|-----------------------|--------------|----------------------|-----------------------|-------------------------------|------------------------|--------------------------------|
| CSSL 084  | Gibbs | 0.76  | 5             | 0.16 | 2           | 0.25 | 4            | 1610.00       | 1                     | 4.26         | 6                    | 1.67                  | 5                             | 3.17                   | 4                              |
| CSSL 111  | Gibbs | 0.77  | 3             | 0.16 | 1           | 0.25 | 3            | 1570.67       | 2                     | 3.51         | 3                    | 1.33                  | 3                             | 3.50                   | 5                              |
| CSSL 100  | Gibbs | 0.77  | 2             | 0.15 | 5           | 0.25 | 2            | 1276.67       | 3                     | 3.01         | 2                    | 0.67                  | 2                             | 2.00                   | 2                              |
| Tifguard  | Gibbs | 0.79  | 1             | 0.16 | 3           | 0.27 | 1            | 1213.33       | 4                     | 3.01         | 1                    | 0.67                  | 1                             | 1                      | 1                              |
| CSSL 069  | Gibbs | 0.70  | 22            | 0.14 | 18          | 0.22 | 17           | 1030.67       | 5                     | 4.84         | 9                    | 3.67                  | 19                            | 6.17                   | 20                             |
| CSSL 022  | Gibbs | 0.68  | 29            | 0.13 | 27          | 0.20 | 27           | 997.33        | 6                     | 5.50         | 17                   | 4.33                  | 27                            | 7.83                   | 28                             |
| CSSL 013  | Gibbs | 0.71  | 20            | 0.14 | 22          | 0.21 | 22           | 920.00        | 7                     | 6.17         | 26                   | 3.33                  | 17                            | 6.50                   | 23                             |
| CSSL 112  | Gibbs | 0.72  | 14            | 0.15 | 9           | 0.22 | 12           | 919.33        | 8                     | 5.52         | 20                   | 3.00                  | 15                            | 4.83                   | 12                             |
| CSSL 060  | Gibbs | 0.71  | 19            | 0.14 | 15          | 0.22 | 16           | 904.00        | 9                     | 5.18         | 13                   | 2.33                  | 8                             | 6.17                   | 18                             |
| CSSL 031  | Gibbs | 0.75  | 6             | 0.15 | 7           | 0.23 | 7            | 878.00        | 10                    | 5.18         | 12                   | 2.67                  | 11                            | 4.00                   | 7                              |
| CSSL 025  | Gibbs | 0.71  | 18            | 0.14 | 25          | 0.21 | 20           | 872.00        | 11                    | 6.03         | 24                   | 4.00                  | 24                            | 5.67                   | 16                             |
| CSSL 051  | Gibbs | 0.71  | 17            | 0.15 | 8           | 0.22 | 10           | 862.00        | 12                    | 5.34         | 15                   | 2.33                  | 9                             | 5.00                   | 13                             |
| CSSL 027  | Gibbs | 0.70  | 24            | 0.14 | 23          | 0.21 | 25           | 860.00        | 13                    | 6.02         | 23                   | 3.67                  | 23                            | 6.67                   | 25                             |
| CSSL 115  | Gibbs | 0.72  | 15            | 0.14 | 16          | 0.21 | 23           | 839.33        | 14                    | 4.51         | 7                    | 2.00                  | 6                             | 6.33                   | 21                             |
| CSSL 058  | Gibbs | 0.71  | 21            | 0.14 | 19          | 0.21 | 21           | 837.33        | 15                    | 6.67         | 28                   | 3.33                  | 18                            | 6.17                   | 19                             |
| CSSL 061  | Gibbs | 0.68  | 28            | 0.14 | 20          | 0.21 | 19           | 832.67        | 16                    | 7.00         | 29                   | 4.00                  | 26                            | 7.00                   | 26                             |
| CSSL 121  | Gibbs | 0.72  | 12            | 0.15 | 13          | 0.22 | 13           | 824.67        | 17                    | 5.50         | 16                   | 3.33                  | 16                            | 5.67                   | 15                             |
| CSSL 014  | Gibbs | 0.73  | 8             | 0.14 | 21          | 0.21 | 18           | 818.67        | 18                    | 4.84         | 10                   | 2.67                  | 10                            | 6.33                   | 22                             |
| CSSL 062  | Gibbs | 0.71  | 16            | 0.15 | 10          | 0.22 | 14           | 801.33        | 19                    | 5.33         | 14                   | 2.67                  | 12                            | 5.33                   | 14                             |
| CSSL 010  | Gibbs | 0.70  | 23            | 0.14 | 24          | 0.21 | 24           | 788.00        | 20                    | 6.03         | 25                   | 4.00                  | 25                            | 8.17                   | 29                             |
| CSSL 113  | Gibbs | 0.69  | 26            | 0.13 | 26          | 0.20 | 28           | 785.33        | 21                    | 5.50         | 18                   | 3.67                  | 21                            | 6.50                   | 24                             |
| CSSL 044  | Gibbs | 0.72  | 13            | 0.14 | 17          | 0.22 | 15           | 765.33        | 22                    | 5.84         | 22                   | 2.67                  | 13                            | 4.83                   | 11                             |
| Florunner | Gibbs | 0.76  | 4             | 0.15 | 4           | 0.24 | 5            | 744.67        | 23                    | 3.51         | 4                    | 3                     | 14                            | 2.67                   | 3                              |
| CSSL 056  | Gibbs | 0.73  | 11            | 0.14 | 14          | 0.22 | 11           | 744.00        | 24                    | 5.67         | 21                   | 3.67                  | 22                            | 4.67                   | 10                             |
| CSSL 009  | Gibbs | 0.68  | 27            | 0.13 | 28          | 0.19 | 29           | 734.67        | 25                    | 5.51         | 19                   | 5.33                  | 29                            | 7.33                   | 27                             |
| CSSL 015  | Gibbs | 0.75  | 7             | 0.15 | 12          | 0.22 | 8            | 709.02        | 26                    | 3.75         | 5                    | 1.50                  | 4                             | 3.50                   | 6                              |
| Fleur 011 | Gibbs | 0.69  | 25            | 0.13 | 29          | 0.20 | 26           | 705.33        | 27                    | 6.36         | 27                   | 5.00                  | 28                            | 5.67                   | 17                             |
| CSSL 055  | Gibbs | 0.73  | 9             | 0.15 | 6           | 0.23 | 6            | 680.67        | 28                    | 4.52         | 8                    | 2.33                  | 7                             | 4.33                   | 8                              |
| CSSL 053  | Gibbs | 0.73  | 10            | 0.15 | 11          | 0.22 | 9            | 540.67        | 29                    | 5.01         | 11                   | 3.67                  | 20                            | 4.50                   | 9                              |
| CSSL 084  | Bowen | 0.74  | 4             | 0.15 | 1           | 0.23 | 1            | 1320.00       | 1                     | 4.17         | 4                    | 1.00                  | 5                             | NA                     | NA                             |
| CSSL 111  | Bowen | 0.70  | 5             | 0.12 | 17          | 0.18 | 6            | 1028.00       | 2                     | 4.00         | 3                    | 0.67                  | 3                             | NA                     | NA                             |
| Florunner | Bowen | 0.74  | 1             | 0.14 | 2           | 0.21 | 4            | 859.33        | 3                     | 4.17         | 5                    | 0.67                  | 4                             | NA                     | NA                             |
| Tifguard  | Bowen | 0.74  | 2             | 0.14 | 3           | 0.23 | 2            | 816.00        | 4                     | 3.50         | 1                    | 0.33                  | 2                             | NA                     | NA                             |
| CSSL 060  | Bowen | 0.65  | 23            | 0.12 | 22          | 0.17 | 24           | 752.67        | 5                     | 5.50         | 7                    | 2.33                  | 11                            | NA                     | NA                             |
| CSSL 013  | Bowen | 0.68  | 13            | 0.12 | 11          | 0.18 | 11           | 690.67        | 6                     | 6.67         | 22                   | 3.00                  | 20                            | NA                     | NA                             |
| CSSL 100  | Bowen | 0.74  | 3             | 0.14 | 4           | 0.22 | 3            | 676.74        | 7                     | 3.73         | 2                    | 0.06                  | 1                             | NA                     | NA                             |
| CSSL 014  | Bowen | 0.70  | 7             | 0.12 | 19          | 0.17 | 20           | 676.67        | 8                     | 5.67         | 9                    | 2.67                  | 15                            | NA                     | NA                             |
| CSSL 044  | Bowen | 0.66  | 19            | 0.13 | 9           | 0.18 | 12           | 661.33        | 9                     | 5.83         | 12                   | 2.00                  | 9                             | NA                     | NA                             |

| Sample    | Field | GNDVI | Rank<br>GNDVI | GRV  | Rank<br>GRV | VARI | Rank<br>VARI | Pod<br>weight | Rank<br>Pod<br>weight | Leaf<br>spot | Rank<br>leaf<br>spot | TSWV<br>mid<br>season | Rank<br>TSWV<br>mid<br>season | TSWV<br>late<br>season | Rank<br>TSWV<br>late<br>season |
|-----------|-------|-------|---------------|------|-------------|------|--------------|---------------|-----------------------|--------------|----------------------|-----------------------|-------------------------------|------------------------|--------------------------------|
| CSSL 113  | Bowen | 0.66  | 20            | 0.12 | 21          | 0.17 | 21           | 659.33        | 10                    | 6.17         | 14                   | 2.67                  | 16                            | NA                     | NA                             |
| CSSL 115  | Bowen | 0.66  | 18            | 0.12 | 23          | 0.17 | 23           | 648.00        | 11                    | 5.83         | 13                   | 1.33                  | 7                             | NA                     | NA                             |
| CSSL 069  | Bowen | 0.64  | 27            | 0.11 | 28          | 0.16 | 29           | 634.00        | 12                    | 5.67         | 10                   | 3.67                  | 24                            | NA                     | NA                             |
| CSSL 009  | Bowen | 0.67  | 15            | 0.12 | 16          | 0.17 | 18           | 628.67        | 13                    | 6.50         | 19                   | 4.00                  | 28                            | NA                     | NA                             |
| CSSL 010  | Bowen | 0.67  | 17            | 0.12 | 18          | 0.17 | 16           | 623.33        | 14                    | 6.33         | 17                   | 3.00                  | 18                            | NA                     | NA                             |
| CSSL 058  | Bowen | 0.68  | 10            | 0.12 | 13          | 0.17 | 15           | 613.33        | 15                    | 7.00         | 26                   | 3.33                  | 22                            | NA                     | NA                             |
| CSSL 056  | Bowen | 0.67  | 16            | 0.13 | 7           | 0.18 | 7            | 588.67        | 16                    | 6.83         | 23                   | 3.67                  | 25                            | NA                     | NA                             |
| CSSL 061  | Bowen | 0.65  | 24            | 0.12 | 20          | 0.17 | 17           | 585.33        | 17                    | 6.83         | 24                   | 2.33                  | 14                            | NA                     | NA                             |
| CSSL 051  | Bowen | 0.67  | 14            | 0.13 | 8           | 0.18 | 9            | 573.33        | 18                    | 6.33         | 18                   | 2.00                  | 10                            | NA                     | NA                             |
| CSSL 112  | Bowen | 0.68  | 12            | 0.12 | 24          | 0.17 | 19           | 536.67        | 19                    | 5.67         | 11                   | 3.00                  | 17                            | NA                     | NA                             |
| CSSL 025  | Bowen | 0.65  | 25            | 0.12 | 26          | 0.16 | 25           | 533.33        | 20                    | 7.33         | 28                   | 3.00                  | 21                            | NA                     | NA                             |
| CSSL 062  | Bowen | 0.66  | 21            | 0.13 | 6           | 0.18 | 8            | 521.33        | 21                    | 6.50         | 20                   | 3.00                  | 19                            | NA                     | NA                             |
| CSSL 031  | Bowen | 0.70  | 6             | 0.13 | 10          | 0.18 | 13           | 514.00        | 22                    | 6.17         | 15                   | 1.67                  | 8                             | NA                     | NA                             |
| CSSL 027  | Bowen | 0.63  | 28            | 0.12 | 15          | 0.17 | 22           | 503.33        | 23                    | 7.00         | 27                   | 3.67                  | 27                            | NA                     | NA                             |
| Fleur 011 | Bowen | 0.66  | 22            | 0.11 | 29          | 0.16 | 28           | 498.00        | 24                    | 6.17         | 16                   | 4.67                  | 29                            | NA                     | NA                             |
| CSSL 053  | Bowen | 0.69  | 8             | 0.13 | 5           | 0.19 | 5            | 484.67        | 25                    | 6.50         | 21                   | 2.33                  | 13                            | NA                     | NA                             |
| CSSL 015  | Bowen | 0.69  | 9             | 0.12 | 14          | 0.18 | 14           | 468.74        | 26                    | 4.73         | 6                    | 1.06                  | 6                             | NA                     | NA                             |
| CSSL 121  | Bowen | 0.64  | 26            | 0.12 | 25          | 0.16 | 26           | 466.67        | 27                    | 6.83         | 25                   | 3.67                  | 26                            | NA                     | NA                             |
| CSSL 022  | Bowen | 0.62  | 29            | 0.11 | 27          | 0.16 | 27           | 466.67        | 28                    | 7.33         | 29                   | 3.33                  | 23                            | NA                     | NA                             |
| CSSL 055  | Bowen | 0.68  | 11            | 0.12 | 12          | 0.18 | 10           | 414.00        | 29                    | 5.50         | 8                    | 2.33                  | 12                            | NA                     | NA                             |

**Table S6:** The effects of introgressions on the traits that were manually collected. Lines with significant introgression effects are presented. For TSWV late season, CSSL 10, CSSL 84 and CSSL 111 which are not statistically significant are highlighted because of their high numeric effects. The introgression effects were calculated as percentages relative to the cultivated Fleur 11

| Sample   | Field | Trait            | Significance | Introgression effect |
|----------|-------|------------------|--------------|----------------------|
| CSSL 015 | Gibbs | Leaf spot        | **           | -40.63               |
| CSSL 084 | Gibbs | Leaf spot        | *            | -34.07               |
| CSSL 084 | Bowen | Leaf spot        | *            | -32.43               |
| CSSL 100 | Gibbs | Leaf spot        | ***          | -52.42               |
| CSSL 100 | Bowen | Leaf spot        | **           | -39.57               |
| CSSL 111 | Gibbs | Leaf spot        | ***          | -44.56               |
| CSSL 111 | Bowen | Leaf spot        | **           | -35.14               |
| CSSL 015 | Gibbs | TSWV mid season  | *            | -70                  |
| CSSL 015 | Bowen | TSWV mid season  | ***          | -77.25               |
| CSSL 031 | Bowen | TSWV mid season  | ***          | -64.29               |
| CSSL 044 | Bowen | TSWV mid season  | **           | -57.14               |
| CSSL 051 | Bowen | TSWV mid season  | **           | -57.14               |
| CSSL 053 | Bowen | TSWV mid season  | *            | -50                  |
| CSSL 055 | Bowen | TSWV mid season  | *            | -50                  |
| CSSL 060 | Bowen | TSWV mid season  | *            | -50                  |
| CSSL 061 | Bowen | TSWV mid season  | *            | -50                  |
| CSSL 084 | Gibbs | TSWV mid season  | **           | -66.67               |
| CSSL 084 | Bowen | TSWV mid season  | ***          | -78.57               |
| CSSL 100 | Gibbs | TSWV mid season  | ***          | -86.67               |
| CSSL 100 | Bowen | TSWV mid season  | ***          | -98.68               |
| CSSL 111 | Gibbs | TSWV mid season  | **           | -73.33               |
| CSSL 111 | Bowen | TSWV mid season  | ***          | -85.71               |
| CSSL 115 | Gibbs | TSWV mid season  | *            | -60                  |
| CSSL 115 | Bowen | TSWV mid season  | ***          | -71.43               |
| CSSL 010 | Gibbs | TSWV late season | NS           | 44.12                |
| CSSL 084 | Gibbs | TSWV late season | NS           | -44.12               |
| CSSL 100 | Gibbs | TSWV late season | *            | -64.71               |
| CSSL 111 | Gibbs | TSWV late season | NS           | -38.24               |
| CSSL 069 | Gibbs | Pod weight       | *            | 46.12                |

| Sample   | Field | Trait      | Significance | Introgression effect |
|----------|-------|------------|--------------|----------------------|
| CSSL 084 | Bowen | Pod weight | ***          | 165.06               |
| CSSL 084 | Gibbs | Pod weight | ***          | 128.26               |
| CSSL 100 | Gibbs | Pod weight | ***          | 81                   |
| CSSL 111 | Bowen | Pod weight | ***          | 106.43               |
| CSSL 111 | Gibbs | Pod weight | ***          | 122.68               |

NS      P > 0.05  
\*        P ≤ 0.05  
\*\*       P ≤ 0.01  
\*\*\*     P ≤ 0.001

**Table S7:** Summary statistics of all GPR variables

| GPR Variable <sup>a</sup> | Pipeline | Field | Significance | Mean | Max   | Min   | SE <sup>b</sup> | Fleur 11 |
|---------------------------|----------|-------|--------------|------|-------|-------|-----------------|----------|
| p1_freq_1                 | 1        | Bowen | *            | 0.37 | 0.459 | 0.254 | 0.009           | 0.35     |
| p1_freq_2                 | 1        | Bowen | ***          | 0.13 | 0.165 | 0.106 | 0.002           | 0.13     |
| p1_freq_3                 | 1        | Bowen | *            | 0.07 | 0.085 | 0.062 | 0.001           | 0.07     |
| p1_freq_4                 | 1        | Bowen | NS           | 0.06 | 0.071 | 0.055 | 0.001           | 0.06     |
| p1_freq_5                 | 1        | Bowen | *            | 0.06 | 0.072 | 0.054 | 0.001           | 0.06     |
| p1_freq_6                 | 1        | Bowen | *            | 0.06 | 0.068 | 0.053 | 0.001           | 0.06     |
| p1_freq_7                 | 1        | Bowen | ***          | 0.06 | 0.069 | 0.054 | 0.001           | 0.06     |
| p1_freq_8                 | 1        | Bowen | ***          | 0.06 | 0.068 | 0.053 | 0.001           | 0.06     |
| p1_freq_9                 | 1        | Bowen | ***          | 0.06 | 0.067 | 0.052 | 0.001           | 0.06     |
| p1_freq_10                | 1        | Bowen | ***          | 0.06 | 0.068 | 0.051 | 0.001           | 0.06     |
| p1_freq_11                | 1        | Bowen | ***          | 0.06 | 0.067 | 0.051 | 0.001           | 0.06     |
| p1_freq_12                | 1        | Bowen | ***          | 0.06 | 0.067 | 0.052 | 0.001           | 0.06     |
| p1_freq_13                | 1        | Bowen | **           | 0.06 | 0.067 | 0.052 | 0.001           | 0.06     |
| p2_freq_1                 | 2        | Bowen | *            | 0.37 | 0.464 | 0.259 | 0.009           | 0.35     |
| p2_freq_2                 | 2        | Bowen | ***          | 0.12 | 0.160 | 0.101 | 0.002           | 0.12     |
| p2_freq_3                 | 2        | Bowen | *            | 0.07 | 0.085 | 0.060 | 0.001           | 0.06     |
| p2_freq_4                 | 2        | Bowen | NS           | 0.06 | 0.071 | 0.054 | 0.001           | 0.06     |
| p2_freq_5                 | 2        | Bowen | *            | 0.06 | 0.072 | 0.053 | 0.001           | 0.06     |
| p2_freq_6                 | 2        | Bowen | *            | 0.06 | 0.069 | 0.052 | 0.001           | 0.06     |
| p2_freq_7                 | 2        | Bowen | ***          | 0.06 | 0.069 | 0.053 | 0.001           | 0.06     |
| p2_freq_8                 | 2        | Bowen | **           | 0.06 | 0.068 | 0.052 | 0.001           | 0.06     |

| GPR Variable <sup>a</sup> | Pipeline | Field | Significance | Mean | Max   | Min   | SE <sup>b</sup> | Fleur 11 |
|---------------------------|----------|-------|--------------|------|-------|-------|-----------------|----------|
| p2_freq_9                 | 2        | Bowen | ***          | 0.06 | 0.068 | 0.051 | 0.001           | 0.06     |
| p2_freq_10                | 2        | Bowen | ***          | 0.06 | 0.068 | 0.050 | 0.001           | 0.06     |
| p2_freq_11                | 2        | Bowen | ***          | 0.06 | 0.068 | 0.050 | 0.001           | 0.06     |
| p2_freq_12                | 2        | Bowen | ***          | 0.06 | 0.068 | 0.050 | 0.001           | 0.06     |
| p2_freq_13                | 2        | Bowen | *            | 0.06 | 0.067 | 0.051 | 0.001           | 0.06     |
| p3_freq_1                 | 3        | Bowen | *            | 0.34 | 0.438 | 0.222 | 0.010           | 0.32     |
| p3_freq_2                 | 3        | Bowen | *            | 0.09 | 0.127 | 0.070 | 0.002           | 0.09     |
| p3_freq_3                 | 3        | Bowen | *            | 0.07 | 0.086 | 0.058 | 0.001           | 0.06     |
| p3_freq_4                 | 3        | Bowen | NS           | 0.06 | 0.071 | 0.053 | 0.001           | 0.06     |
| p3_freq_5                 | 3        | Bowen | NS           | 0.06 | 0.071 | 0.054 | 0.001           | 0.06     |
| p3_freq_6                 | 3        | Bowen | NS           | 0.06 | 0.068 | 0.053 | 0.001           | 0.06     |
| p3_freq_7                 | 3        | Bowen | *            | 0.06 | 0.069 | 0.054 | 0.001           | 0.06     |
| p3_freq_8                 | 3        | Bowen | *            | 0.06 | 0.067 | 0.053 | 0.001           | 0.06     |
| p3_freq_9                 | 3        | Bowen | *            | 0.06 | 0.067 | 0.051 | 0.001           | 0.06     |
| p3_freq_10                | 3        | Bowen | *            | 0.06 | 0.067 | 0.051 | 0.001           | 0.06     |
| p3_freq_11                | 3        | Bowen | *            | 0.06 | 0.067 | 0.051 | 0.001           | 0.06     |
| p3_freq_12                | 3        | Bowen | *            | 0.06 | 0.067 | 0.051 | 0.001           | 0.06     |
| p3_freq_13                | 3        | Bowen | NS           | 0.06 | 0.067 | 0.052 | 0.001           | 0.06     |
| p1_freq_1                 | 3        | Gibbs | NS           | 0.29 | 0.352 | 0.246 | 0.0038          | 0.35     |
| p1_freq_2                 | 1        | Gibbs | ***          | 0.15 | 0.173 | 0.116 | 0.0027          | 0.17     |
| p1_freq_3                 | 1        | Gibbs | NS           | 0.07 | 0.080 | 0.067 | 0.0006          | 0.08     |
| p1_freq_4                 | 1        | Gibbs | NS           | 0.06 | 0.069 | 0.058 | 0.0005          | 0.07     |
| p1_freq_5                 | 1        | Gibbs | NS           | 0.06 | 0.066 | 0.056 | 0.0004          | 0.06     |
| p1_freq_6                 | 1        | Gibbs | NS           | 0.06 | 0.064 | 0.055 | 0.0004          | 0.06     |
| p1_freq_7                 | 1        | Gibbs | NS           | 0.06 | 0.065 | 0.056 | 0.0004          | 0.06     |
| p1_freq_8                 | 1        | Gibbs | NS           | 0.06 | 0.064 | 0.055 | 0.0004          | 0.06     |
| p1_freq_9                 | 1        | Gibbs | NS           | 0.06 | 0.063 | 0.054 | 0.0004          | 0.06     |
| p1_freq_10                | 1        | Gibbs | NS           | 0.06 | 0.062 | 0.054 | 0.0004          | 0.06     |
| p1_freq_11                | 1        | Gibbs | NS           | 0.06 | 0.062 | 0.054 | 0.0004          | 0.06     |
| p1_freq_12                | 1        | Gibbs | NS           | 0.06 | 0.062 | 0.053 | 0.0004          | 0.06     |
| p1_freq_13                | 1        | Gibbs | NS           | 0.06 | 0.062 | 0.054 | 0.0004          | 0.06     |
| p2_freq_1                 | 2        | Gibbs | NS           | 0.29 | 0.350 | 0.247 | 0.0038          | 0.35     |

| GPR Variable <sup>a</sup> | Pipeline | Field | Significance | Mean | Max   | Min   | SE <sup>b</sup> | Fleur 11 |
|---------------------------|----------|-------|--------------|------|-------|-------|-----------------|----------|
| p2_freq_2                 | 2        | Gibbs | ***          | 0.14 | 0.163 | 0.108 | 0.0026          | 0.16     |
| p2_freq_3                 | 2        | Gibbs | NS           | 0.07 | 0.079 | 0.065 | 0.0007          | 0.08     |
| p2_freq_4                 | 2        | Gibbs | NS           | 0.06 | 0.069 | 0.057 | 0.0005          | 0.07     |
| p2_freq_5                 | 2        | Gibbs | NS           | 0.06 | 0.066 | 0.056 | 0.0004          | 0.06     |
| p2_freq_6                 | 2        | Gibbs | NS           | 0.06 | 0.064 | 0.054 | 0.0004          | 0.06     |
| p2_freq_7                 | 2        | Gibbs | NS           | 0.06 | 0.064 | 0.056 | 0.0004          | 0.06     |
| p2_freq_8                 | 2        | Gibbs | NS           | 0.06 | 0.064 | 0.055 | 0.0004          | 0.06     |
| p2_freq_9                 | 2        | Gibbs | NS           | 0.06 | 0.062 | 0.054 | 0.0004          | 0.06     |
| p2_freq_10                | 2        | Gibbs | NS           | 0.06 | 0.062 | 0.054 | 0.0004          | 0.06     |
| p2_freq_11                | 2        | Gibbs | NS           | 0.06 | 0.062 | 0.054 | 0.0004          | 0.06     |
| p2_freq_12                | 2        | Gibbs | NS           | 0.06 | 0.062 | 0.053 | 0.0004          | 0.06     |
| p2_freq_13                | 2        | Gibbs | NS           | 0.06 | 0.063 | 0.053 | 0.0004          | 0.06     |
| p3_freq_1                 | 3        | Gibbs | NS           | 0.23 | 0.266 | 0.206 | 0.0026          | 0.27     |
| p3_freq_2                 | 3        | Gibbs | *            | 0.09 | 0.113 | 0.074 | 0.0017          | 0.11     |
| p3_freq_3                 | 3        | Gibbs | NS           | 0.07 | 0.077 | 0.063 | 0.0007          | 0.07     |
| p3_freq_4                 | 3        | Gibbs | NS           | 0.06 | 0.071 | 0.057 | 0.0006          | 0.07     |
| p3_freq_5                 | 3        | Gibbs | NS           | 0.06 | 0.068 | 0.054 | 0.0006          | 0.06     |
| p3_freq_6                 | 3        | Gibbs | NS           | 0.06 | 0.066 | 0.053 | 0.0006          | 0.06     |
| p3_freq_7                 | 3        | Gibbs | NS           | 0.06 | 0.066 | 0.054 | 0.0005          | 0.06     |
| p3_freq_8                 | 3        | Gibbs | NS           | 0.06 | 0.065 | 0.053 | 0.0005          | 0.06     |
| p3_freq_9                 | 3        | Gibbs | NS           | 0.06 | 0.064 | 0.052 | 0.0006          | 0.06     |
| p3_freq_10                | 3        | Gibbs | NS           | 0.06 | 0.064 | 0.051 | 0.0006          | 0.06     |
| p3_freq_11                | 3        | Gibbs | NS           | 0.06 | 0.064 | 0.051 | 0.0006          | 0.06     |
| p3_freq_12                | 3        | Gibbs | NS           | 0.06 | 0.064 | 0.052 | 0.0006          | 0.06     |
| p3_freq_13                | 3        | Gibbs | NS           | 0.06 | 0.065 | 0.052 | 0.0006          | 0.06     |

NS
P > 0.05

\*
P ≤ 0.05

\*\*
P ≤ 0.01

\*\*\*
P ≤ 0.001

<sup>a</sup>
GPR variables range from 0 to 1

<sup>b</sup>
Standard error

**Table S8:** Comparison of CSSL ranking ability between manual pod weight data and GPR variables that showed significant correlations with pod weight in Bowen and Gibbs. The CSSLs are ranked based on pod weight performance. The ranking by the GPR variables is indicated in the respective columns for each variable. Green font indicates top 10 CSSLs as ranked by pod weight, while purple font indicates bottom 10 CSSLs as ranked by pod weight

[illegible]



| Line      | Field | Pod   | p1_fr | p2_fr | p3_fr | p3_fre | p3_fre | p3_fre | p3_fre |
|-----------|-------|-------|-------|-------|-------|-------|-------|-------|-------|-------|-------|-------|--------|--------|--------|--------|
|           |       | weigh | eq_1  | eq_1  | eq_1  | eq_3  | eq_4  | eq_5  | eq_6  | eq_7  | eq_8  | eq_9  | q_10   | q_11   | q_12   | q_13   |
|           |       | t     |       |       |       |       |       |       |       |       |       |       |        |        |        |        |
| CSSL 100  | Gibbs | 3     | 2*    | 2*    | 2*    | 7*    | 4*    | 2*    | 2*    | 2*    | 2*    | 2*    | 2*     | 2*     | 2*     | 2*     |
| Tifguard  | Gibbs | 4     | 1*    | 1*    | 7*    | 5*    | 3*    | 3*    | 3*    | 3*    | 3*    | 3*    | 4*     | 4*     | 4*     | 3*     |
| CSSL 069  | Gibbs | 5     | 20    | 18    | 11    | 14    | 18    | 24    | 20    | 22    | 22    | 22    | 22     | 22     | 22     | 22     |
| CSSL 022  | Gibbs | 6     | 24    | 24    | 26    | 11    | 11    | 11    | 12    | 10*   | 12    | 12    | 11     | 11     | 11     | 12     |
| CSSL 013  | Gibbs | 7     | 16    | 22    | 19    | 20    | 15    | 16    | 16    | 17    | 17    | 16    | 15     | 15     | 15     | 16     |
| CSSL 112  | Gibbs | 8     | 17    | 16    | 8     | 16    | 12    | 15    | 14    | 12    | 11    | 13    | 14     | 13     | 14     | 13     |
| CSSL 060  | Gibbs | 9     | 10    | 12    | 14    | 27    | 24    | 21    | 23    | 21    | 21    | 20    | 18     | 18     | 18     | 20     |
| CSSL 031  | Gibbs | 10    | 18    | 17    | 15    | 25    | 26    | 26    | 26    | 26    | 26    | 26    | 26     | 26     | 26     | 26     |
| CSSL 025  | Gibbs | 11    | 27    | 27    | 25    | 21    | 14    | 12    | 13    | 13    | 13    | 11    | 10     | 9      | 10     | 11     |
| CSSL 051  | Gibbs | 12    | 12    | 11    | 17    | 12    | 21    | 20    | 24    | 24    | 24    | 24    | 24     | 23     | 24     | 24     |
| CSSL 027  | Gibbs | 13    | 22    | 19    | 18    | 29    | 29    | 29    | 29    | 29    | 29    | 29    | 29     | 29     | 29     | 29     |
| CSSL 115  | Gibbs | 14    | 7     | 7     | 4     | 1     | 5     | 7     | 5     | 7     | 7     | 8     | 9      | 8      | 9      | 6      |
| CSSL 058  | Gibbs | 15    | 19    | 20    | 12    | 23    | 28    | 28    | 28    | 28    | 28    | 28    | 28     | 28     | 28     | 28     |
| CSSL 061  | Gibbs | 16    | 11    | 13    | 20    | 19    | 22    | 22    | 19    | 18    | 18    | 18    | 20     | 20     | 20     | 18     |
| CSSL 121  | Gibbs | 17    | 21    | 21    | 10    | 18    | 8     | 8     | 7     | 5     | 5     | 5     | 3      | 3      | 3      | 5      |
| CSSL 014  | Gibbs | 18    | 4     | 4     | 1     | 10    | 17    | 18    | 18    | 20    | 20    | 21    | 21     | 21     | 21     | 21     |
| CSSL 062  | Gibbs | 19    | 6     | 6     | 9     | 24    | 23    | 23    | 22    | 19    | 19    | 19    | 19     | 19     | 19     | 19     |
| CSSL 010  | Gibbs | 20    | 9     | 9     | 13    | 3     | 7     | 13    | 10    | 14    | 14    | 15    | 17     | 16     | 16     | 14     |
| CSSL 113  | Gibbs | 21    | 25**  | 26**  | 27**  | 28**  | 27**  | 27**  | 27**  | 27**  | 27**  | 27**  | 27**   | 27**   | 27**   | 27**   |
| CSSL 044  | Gibbs | 22    | 26**  | 25**  | 22**  | 22**  | 20**  | 14    | 15    | 15    | 15    | 14    | 13     | 14     | 13     | 15     |
| Florunner | Gibbs | 23    | 14    | 14    | 23**  | 17    | 19    | 17    | 17    | 16    | 16    | 17    | 16     | 17     | 17     | 17     |
| CSSL 056  | Gibbs | 24    | 28**  | 28**  | 28**  | 13    | 9     | 6     | 8     | 6     | 6     | 6     | 5      | 6      | 5      | 7      |
| CSSL 009  | Gibbs | 25    | 23**  | 23**  | 24**  | 15    | 13    | 9     | 11    | 9     | 9     | 9     | 6      | 7      | 7      | 9      |
| CSSL 015  | Gibbs | 26    | 8     | 8     | 16    | 8     | 10    | 10    | 9     | 11    | 10    | 10    | 12     | 12     | 12     | 10     |
| Fleur 011 | Gibbs | 27    | 29**  | 29**  | 29**  | 26**  | 25**  | 25**  | 25**  | 25**  | 25**  | 25**  | 25**   | 25**   | 25**   | 25**   |
| CSSL 055  | Gibbs | 28    | 5     | 5     | 6     | 6     | 2     | 4     | 6     | 8     | 8     | 7     | 8      | 10     | 8      | 8      |
| CSSL 053  | Gibbs | 29    | 15    | 15    | 21**  | 9     | 16    | 19    | 21**  | 23**  | 23**  | 23**  | 23**   | 24**   | 23**   | 23**   |

\*GPR variable ranking among the top 10 consistent with manual pod weight

\*\*GPR variable ranking among the bottom 10 consistent with manual pod weight
